# Supplementary material
Source: PubMed Central journal article supplement (PMC4810796)
Supplement: JHC626499_Supplement.pdf [file JHC626499_Supplement.pdf]

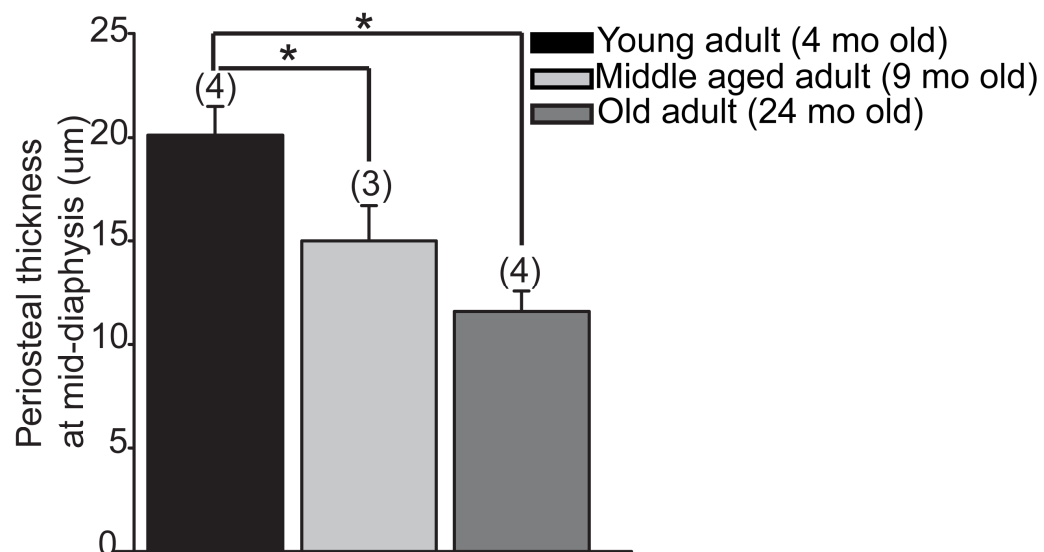

**Supplemental Figure 1. Periosteal thickness declines with age in male C3H**

**mice.** Periosteal thickness was analyzed in 4, 9, and 24 old adult mice and the numbers in parenthesis indicate the number of animals analyzed for each age group.

Bars represent mean +/- SEM;  $p < 0.05$  after a one-way ANOVA, Tukey's post-hoc test.
